# Supplementary material for: Social-Ecological Correlates of Children’s Independent Mobility: A Systematic Review
Source: MDPI journal article supplement (doi:10.3390/ijerph19031604), 2022-01-30

## Supplementary Files

**Table S1.** PRISMA Checklist

| Section and Topic    | Item # | Checklist item                                                                                                                                                                                                                                                                   | Location where item is reported |
|----------------------|--------|----------------------------------------------------------------------------------------------------------------------------------------------------------------------------------------------------------------------------------------------------------------------------------|---------------------------------|
| <b>TITLE</b>         |        |                                                                                                                                                                                                                                                                                  |                                 |
| Title                | 1      | Identify the report as a systematic review.                                                                                                                                                                                                                                      | Page 1                          |
| <b>ABSTRACT</b>      |        |                                                                                                                                                                                                                                                                                  |                                 |
| Abstract             | 2      | See the PRISMA 2020 for Abstracts checklist.                                                                                                                                                                                                                                     | 1                               |
| <b>INTRODUCTION</b>  |        |                                                                                                                                                                                                                                                                                  |                                 |
| Rationale            | 3      | Describe the rationale for the review in the context of existing knowledge.                                                                                                                                                                                                      | 1-2                             |
| Objectives           | 4      | Provide an explicit statement of the objective(s) or question(s) the review addresses.                                                                                                                                                                                           | 2                               |
| <b>METHODS</b>       |        |                                                                                                                                                                                                                                                                                  |                                 |
| Eligibility criteria | 5      | Specify the inclusion and exclusion criteria for the review and how studies were grouped for the syntheses.                                                                                                                                                                      | 3                               |
| Information sources  | 6      | Specify all databases, registers, websites, organisations, reference lists and other sources searched or consulted to identify studies. Specify the date when each source was last searched or consulted.                                                                        | 3                               |
| Search strategy      | 7      | Present the full search strategies for all databases, registers and websites, including any filters and limits used.                                                                                                                                                             | 3                               |
| Selection process    | 8      | Specify the methods used to decide whether a study met the inclusion criteria of the review, including how many reviewers screened each record and each report retrieved, whether they worked independently, and if applicable, details of automation tools used in the process. | 3                               |

| Section and Topic             | Item # | Checklist item                                                                                                                                                                                                                                                                                       | Location where item is reported |
|-------------------------------|--------|------------------------------------------------------------------------------------------------------------------------------------------------------------------------------------------------------------------------------------------------------------------------------------------------------|---------------------------------|
| Data collection process       | 9      | Specify the methods used to collect data from reports, including how many reviewers collected data from each report, whether they worked independently, any processes for obtaining or confirming data from study investigators, and if applicable, details of automation tools used in the process. | 3                               |
| Data items                    | 10a    | List and define all outcomes for which data were sought. Specify whether all results that were compatible with each outcome domain in each study were sought (e.g. for all measures, time points, analyses), and if not, the methods used to decide which results to collect.                        | 3-4                             |
|                               | 10b    | List and define all other variables for which data were sought (e.g. participant and intervention characteristics, funding sources). Describe any assumptions made about any missing or unclear information.                                                                                         | 3-4                             |
| Study risk of bias assessment | 11     | Specify the methods used to assess risk of bias in the included studies, including details of the tool(s) used, how many reviewers assessed each study and whether they worked independently, and if applicable, details of automation tools used in the process.                                    | 3-4                             |
| Effect measures               | 12     | Specify for each outcome the effect measure(s) (e.g. risk ratio, mean difference) used in the synthesis or presentation of results.                                                                                                                                                                  | 4                               |
| Synthesis methods             | 13a    | Describe the processes used to decide which studies were eligible for each synthesis (e.g. tabulating the study intervention characteristics and comparing against the planned groups for each synthesis (item #5)).                                                                                 | 4                               |
|                               | 13b    | Describe any methods required to prepare the data for presentation or synthesis, such as handling of missing summary statistics, or data conversions.                                                                                                                                                | 4                               |
|                               | 13c    | Describe any methods used to tabulate or visually display results of individual studies and syntheses.                                                                                                                                                                                               | 4                               |
|                               | 13d    | Describe any methods used to synthesize results and provide a rationale for the choice(s). If meta-analysis was performed, describe the model(s), method(s) to identify the presence and extent of statistical heterogeneity, and software package(s) used.                                          | 4                               |

| Section and Topic             | Item # | Checklist item                                                                                                                                                                                                                   | Location where item is reported    |
|-------------------------------|--------|----------------------------------------------------------------------------------------------------------------------------------------------------------------------------------------------------------------------------------|------------------------------------|
|                               | 13e    | Describe any methods used to explore possible causes of heterogeneity among study results (e.g. subgroup analysis, meta-regression).                                                                                             | n/a                                |
|                               | 13f    | Describe any sensitivity analyses conducted to assess robustness of the synthesized results.                                                                                                                                     | n/a                                |
| Reporting bias assessment     | 14     | Describe any methods used to assess risk of bias due to missing results in a synthesis (arising from reporting biases).                                                                                                          | n/a                                |
| Certainty assessment          | 15     | Describe any methods used to assess certainty (or confidence) in the body of evidence for an outcome.                                                                                                                            | 3; Supplemental file S.3           |
| <b>RESULTS</b>                |        |                                                                                                                                                                                                                                  |                                    |
| Study selection               | 16a    | Describe the results of the search and selection process, from the number of records identified in the search to the number of studies included in the review, ideally using a flow diagram.                                     | 4                                  |
|                               | 16b    | Cite studies that might appear to meet the inclusion criteria, but which were excluded, and explain why they were excluded.                                                                                                      | 4                                  |
| Study characteristics         | 17     | Cite each included study and present its characteristics.                                                                                                                                                                        | 5-6; Supplemental file S.2 and S.4 |
| Risk of bias in studies       | 18     | Present assessments of risk of bias for each included study.                                                                                                                                                                     | n/a                                |
| Results of individual studies | 19     | For all outcomes, present, for each study: (a) summary statistics for each group (where appropriate) and (b) an effect estimate and its precision (e.g. confidence/credible interval), ideally using structured tables or plots. | Supplemental file S.4              |
|                               | 20a    | For each synthesis, briefly summarise the characteristics and risk of bias among contributing studies.                                                                                                                           | n/a                                |

| Section and Topic         | Item # | Checklist item                                                                                                                                                                                                                                                                       | Location where item is reported |
|---------------------------|--------|--------------------------------------------------------------------------------------------------------------------------------------------------------------------------------------------------------------------------------------------------------------------------------------|---------------------------------|
| Results of syntheses      | 20b    | Present results of all statistical syntheses conducted. If meta-analysis was done, present for each the summary estimate and its precision (e.g. confidence/credible interval) and measures of statistical heterogeneity. If comparing groups, describe the direction of the effect. | Supplemental file S.4           |
|                           | 20c    | Present results of all investigations of possible causes of heterogeneity among study results.                                                                                                                                                                                       | n/a                             |
|                           | 20d    | Present results of all sensitivity analyses conducted to assess the robustness of the synthesized results.                                                                                                                                                                           | n/a                             |
| Reporting biases          | 21     | Present assessments of risk of bias due to missing results (arising from reporting biases) for each synthesis assessed.                                                                                                                                                              | n/a                             |
| Certainty of evidence     | 22     | Present assessments of certainty (or confidence) in the body of evidence for each outcome assessed.                                                                                                                                                                                  | Supplemental file S.3           |
| <b>DISCUSSION</b>         |        |                                                                                                                                                                                                                                                                                      |                                 |
| Discussion                | 23a    | Provide a general interpretation of the results in the context of other evidence.                                                                                                                                                                                                    | 7-9                             |
|                           | 23b    | Discuss any limitations of the evidence included in the review.                                                                                                                                                                                                                      | 9-10                            |
|                           | 23c    | Discuss any limitations of the review processes used.                                                                                                                                                                                                                                | 9-10                            |
|                           | 23d    | Discuss implications of the results for practice, policy, and future research.                                                                                                                                                                                                       | 7-10                            |
| <b>OTHER INFORMATION</b>  |        |                                                                                                                                                                                                                                                                                      |                                 |
| Registration and protocol | 24a    | Provide registration information for the review, including register name and registration number, or state that the review was not registered.                                                                                                                                       | 3                               |
|                           | 24b    | Indicate where the review protocol can be accessed, or state that a protocol was not prepared.                                                                                                                                                                                       | 3                               |
|                           | 24c    | Describe and explain any amendments to information provided at registration or in the protocol.                                                                                                                                                                                      | n/a                             |

| Section and Topic                              | Item # | Checklist item                                                                                                                                                                                                                             | Location where item is reported |
|------------------------------------------------|--------|--------------------------------------------------------------------------------------------------------------------------------------------------------------------------------------------------------------------------------------------|---------------------------------|
| Support                                        | 25     | Describe sources of financial or non-financial support for the review, and the role of the funders or sponsors in the review.                                                                                                              | 12                              |
| Competing interests                            | 26     | Declare any competing interests of review authors.                                                                                                                                                                                         | 12                              |
| Availability of data, code and other materials | 27     | Report which of the following are publicly available and where they can be found: template data collection forms; data extracted from included studies; data used for all analyses; analytic code; any other materials used in the review. | Supplemental files S2-S4        |

**Table S2.** Descriptions of included studies (n=53)

| Author<br>Year<br>Country<br><i>Data from...</i>     | Study Design    | Parent Sample                                                       | Child sample                                                                            | Variables / Measurement                                                                                                                                                                                                                                                                                                                                                               | Results                                                                                                                                                                                                                                                                               |
|------------------------------------------------------|-----------------|---------------------------------------------------------------------|-----------------------------------------------------------------------------------------|---------------------------------------------------------------------------------------------------------------------------------------------------------------------------------------------------------------------------------------------------------------------------------------------------------------------------------------------------------------------------------------|---------------------------------------------------------------------------------------------------------------------------------------------------------------------------------------------------------------------------------------------------------------------------------------|
| Aggio et al.<br>2017<br>United Kingdom<br><i>MCS</i> | Cross-sectional | n=3856*                                                             | 7 years                                                                                 | <b>Outcome variable</b><br>CIM (play outside without close supervision)<br>Physical activity<br><b>Measurement</b><br>Survey; Waist-worn accelerometry<br><b>Independent variable(s)</b><br>Socio-demographics; behavioural (sedentary behaviour); environmental (proximity to friends and family); social (Strengths and Difficulties Questionnaire)<br><b>Measurement</b><br>Survey | Children who are older, living in poverty, who live in proximity to friends and family, are white British have, and have fewer pro-social behaviours, and more externalizing conduct problems, and fewer internalizing problems, had greater odds of having independent outdoor play. |
| Alparone et al.<br>2012<br>Italy                     | Cross-sectional | n=313*<br>Mothers<br>Mean age 37.50 years                           | 8-10 years<br>G (51.4%); B (48.6%)                                                      | <b>Outcome variable</b><br>CIM index<br><b>Measurement</b><br>Questionnaire<br><b>Independent variable(s)</b><br>Socio-demographics; Maternal perception of social danger; positive potentiality of outdoor autonomy; neighbourhood relations; sense of community;<br><b>Measurement</b><br>Questionnaire                                                                             | Mother's perception of positive potentiality of outdoor autonomy was + associated with CIM. Social danger perception and birth order were – associated and child age was + associated with CIM.                                                                                       |
| Ayllón<br>2019<br>Spain<br><i>CAPAS-Ciudad</i>       | Cross-sectional | n=1450*<br>Mother mean age 43.02±5.03<br>Father mean age 45.38±5.43 | n=1450<br>9-11 years old; Grades 4, 5, 6<br>Mean age 10.53±0.90<br>G (53.2%); B (46.8%) | <b>Outcome variable</b><br>CIM (CIM to/from school)<br><b>Measurement</b><br>Questionnaire<br><b>Independent variable(s)</b><br>Parent reported: Socio-demographics; child autonomy, perceived difficulty for                                                                                                                                                                         | Parents' willingness for CIM to school, parents' perception of child autonomy, child having house keys, year in school, position in the family were + associated with CIM to school. While parents' perceived difficulty for CIM to school was – associated with CIM.                 |

|                                                |                 |                                                   |                                                                                              |                                                                                                                                                                                                                                                                                                                                                             |                                                                                                                                                                                                                                                    |
|------------------------------------------------|-----------------|---------------------------------------------------|----------------------------------------------------------------------------------------------|-------------------------------------------------------------------------------------------------------------------------------------------------------------------------------------------------------------------------------------------------------------------------------------------------------------------------------------------------------------|----------------------------------------------------------------------------------------------------------------------------------------------------------------------------------------------------------------------------------------------------|
|                                                |                 |                                                   |                                                                                              | CIM, parents' willingness for CIM, frequency of CIM for outdoor leisure activities, having house keys, perceived dangers<br><b>Measurement</b><br>Questionnaire                                                                                                                                                                                             | Children in year 6 had greater CIM compared to children in lower grades.                                                                                                                                                                           |
| Ayllón<br>2020<br>Spain<br><i>CAPAS-Ciudad</i> | Cross-sectional |                                                   | n=1106*<br>8-12 years old;<br>Mean age 10.6±2.04<br>G (48.6%); B (51.4%)                     | <b>Outcome variable</b><br>CIM (CIM to/from school)<br><b>Measurement</b><br>Questionnaire<br><b>Independent variable(s)</b><br>Child reported: Socio-demographics; perceived difficulty for CIM, perceived distance to school, attitude for CIM to school, willingness for CIM; house keys, CIM for outdoor leisure<br><b>Measurement</b><br>Questionnaire | The study highlighted that perceived difficulty of CIM to school (-), attitudes and willingness for CIM to school (+) were associated with CIM to and/or from school. A shorter perceived distance home to school was associated with greater CIM. |
| Bhosale<br>2017<br>New Zealand                 | Cross-sectional | n=500*<br>Mean age 43.9±5.8 years<br>F=373; M=118 | n=544*<br>12.2 ±0.6 years<br>G=272; B=257                                                    | <b>Outcome variable</b><br>CIM (mobility licenses and index)<br><b>Measurement</b><br>Questionnaire<br><b>Independent variable(s)</b><br>Socio-demographics; active transport; organized activities; bicycle/car ownership; parents' past IM behaviour<br><b>Measurement</b><br>Questionnaire                                                               | Parents had greater IM than their children and a greater number of mobility licences. Bike ownership increased and number of organized activities decreased generationally.                                                                        |
| Broberg et al.<br>(a)<br>2013<br>Finland       | Cross-sectional |                                                   | n=1837*<br>5 <sup>th</sup> and 7 <sup>th</sup> grade<br>10-12 years; 13-15 years<br>B (>50%) | <b>Outcome variable</b><br>CIM (accompaniment to affordances)<br><b>Measurement</b><br>Survey<br><b>Independent variable(s)</b><br>Environmental likeability, Bullerby grid; GIS-based environmental measures<br><b>Measurement</b><br>Survey<br>Mapping activity                                                                                           | Increasing housing density and population around an affordance was + associated with accessing the affordance independently. Floor area ratio was – associated with independent access to affordances.                                             |

|                                          |                 |                                            |                                                                                                                                                                                     |                                                                                                                                                                                                                                                                                                                                                                                              |                                                                                                                                                                                                                                                                                                                                                                                                                                               |
|------------------------------------------|-----------------|--------------------------------------------|-------------------------------------------------------------------------------------------------------------------------------------------------------------------------------------|----------------------------------------------------------------------------------------------------------------------------------------------------------------------------------------------------------------------------------------------------------------------------------------------------------------------------------------------------------------------------------------------|-----------------------------------------------------------------------------------------------------------------------------------------------------------------------------------------------------------------------------------------------------------------------------------------------------------------------------------------------------------------------------------------------------------------------------------------------|
| Broberg et al.<br>(b)<br>2013<br>Finland | Cross-sectional |                                            | n=901*<br>Year 5 (47%)<br>11 years;<br>Year 8 (53%)<br>14 years                                                                                                                     | <b>Outcome variable</b><br>CIM (accompaniment to each meaningful place)<br><b>Measurement</b><br>softGIS survey<br><b>Independent variable(s)</b><br>Socio-demographics, physical environment measured factors (GIS)<br><b>Measurement</b><br>softGIS survey                                                                                                                                 | Single family housing, longer distances from public transport and sports facilities, and dense residential structures were + associated with CIM. Big buildings and public transport hubs and increasing distance from home to school were – associated with CIM.                                                                                                                                                                             |
| Buliung<br>2017<br>Canada<br><i>BEAT</i> | Cross-sectional | n=651* (to school)<br>n=708* (from school) | n=651* (to school)<br>n=708* (from school)<br>9-13 years<br>Mean age 11 years<br>G (50%); B (50%)                                                                                   | <b>Outcome variable</b><br>CIM (travel independently/escorted)<br><b>Measurement</b><br>Activity travel survey<br><b>Independent variable(s)</b><br>Socio-demographics; environment; parent and child perceptions of safety<br><b>Measurement</b><br>Activity travel survey; route mapping                                                                                                   | A number of variables are associated with CIM including distance, age, gender, traffic volume and flexible parental work schedules.                                                                                                                                                                                                                                                                                                           |
| Carver et al.<br>2012<br>Australia       | Cross-sectional | n=891*                                     | n=688*<br>Primary schoolchildren<br>n=430<br>G (52%); M(48%)<br>Mean age 10.4±1.2<br>Secondary schoolchildren<br>n=258<br>G (48%); B (52%)<br>Mean age 13.7±1.0<br>School year 3-10 | <b>Outcome variable</b><br>CIM (travel mode to/from school/weekends, accompaniment, mobility licences score)(0-6 scale)<br><b>Measurement</b><br>Policy Studies Institute (PSI) international CIM Study Child & parent surveys<br><b>Independent variable(s)</b><br>Socio-demographics, Settlement types (urban/rural), mobility licences<br><b>Measurement</b><br>PSI Child & parent survey | CIM had no significant differences in settlement type (urban/rural). Mobile phone ownership + associated with mobility licences in boys attending urban primary schools. Mobility licences were + associated odds of walking/cycling independently in boys and primary school girls (not significant for girls in rural areas). Access to outdoor play spaces was + associated with mobility licences for urban boys and rural primary girls. |
| Carver et al.<br>2013<br>Australia       | Cross-sectional | n=1239*<br>Mothers (88%)                   | n=784* Primary schoolchildren<br>Mean age=10.4±1.2<br>n=455* Secondary schoolchildren<br>Mean age=13.7±1.0                                                                          | <b>Outcome variable</b><br>CIM (mobility licences(0-6 scale); actual mobility<br><b>Measurement</b><br>Child & parent questionnaire<br><b>Independent variable(s)</b>                                                                                                                                                                                                                        | Mobility licences were + associated with higher levels of CIM on non-school journeys (both primary/secondary) and walking/cycling independently to school (primary schoolchildren).                                                                                                                                                                                                                                                           |

|                                                           |                     |                                                     |                                                                                                        |                                                                                                                                                                                                                                                                                                                                                                                                                                 |                                                                                                                                                                                                                                                                                                                                                                                                                                                                     |
|-----------------------------------------------------------|---------------------|-----------------------------------------------------|--------------------------------------------------------------------------------------------------------|---------------------------------------------------------------------------------------------------------------------------------------------------------------------------------------------------------------------------------------------------------------------------------------------------------------------------------------------------------------------------------------------------------------------------------|---------------------------------------------------------------------------------------------------------------------------------------------------------------------------------------------------------------------------------------------------------------------------------------------------------------------------------------------------------------------------------------------------------------------------------------------------------------------|
|                                                           |                     |                                                     | 10-12 years<br>English and<br>Australian children<br>G (50%); B (50%)                                  | Urbanization (rural, urban); household<br>car access; mobility licenses<br><b>Measurement</b><br>Child & parent questionnaire                                                                                                                                                                                                                                                                                                   |                                                                                                                                                                                                                                                                                                                                                                                                                                                                     |
| Carver et al.<br>2014<br>Australia<br><i>SPEEDY</i>       | Longitudinal        | n=1121*                                             | n=1121* (T1)<br>G (57%); B (43%)<br>n=491* (T2: 1 year<br>follow-up)<br>G (61%); B (39%)<br>9-10 years | <b>Outcome variable</b><br>CIM (travel mode to school;<br>accompaniment)<br><b>Measurement</b><br>Child & parent questionnaire<br><b>Independent variable(s)</b><br>Socio-demographics; environment<br>characteristics (GIS); perceptions of social<br>and physical environment;<br>neighbourhood walkability score;<br>parental rules about child's physical<br>activity<br><b>Measurement</b><br>Child & parent questionnaire | Boys had higher CIM compared to girls, but<br>difference diminished with age.<br>Longitudinally, land use mix was +<br>associated and proportion of main roads and<br>parental encouragement were – associated<br>with girls' CIM. Number of siblings was +<br>associated with CIM at T1. Parents allowing<br>children to play outside anywhere in<br>neighbourhood was + associated and<br>household car access was – associated<br>longitudinally with boys' CIM. |
| Cervesato et al.<br>2019<br>Canada                        | Cross-<br>sectional | n=979*<br>weekday trips;<br>n=315*<br>weekend trips | n=979 weekday<br>trips; n=315<br>weekend trips<br>9-11 years                                           | <b>Outcome variable</b><br>CIM (independent weekday/weekend<br>trips)<br><b>Measurement</b><br>Survey: 2011 Quebec Metropolitan<br>Community Origin-Destination data<br><b>Independent variable(s)</b><br>Socio-demographics, household<br>variables, built environment variables<br><b>Measurement</b><br>Survey: 2011 Quebec Metropolitan<br>Community Origin-Destination data                                                | Independent trips of children 9-11 years old<br>drops significantly on weekends versus<br>weekday. A number of individual-level<br>variables (age (+), gender (girls +), household<br>variables (number of cars (-), number of<br>persons (-)), and built environment variables<br>(new suburbs, periphery, outlying rural (-);<br>distance (-)) were significantly associated<br>with children's independent trips.                                                |
| Chaudhury et<br>al.<br>2017<br>New Zealand<br><i>KITC</i> | Cross-<br>sectional | n=240*                                              | n=240*<br>9-12 years                                                                                   | <b>Outcome variable</b><br>CIM (time, origin, destination, travel<br>mode, accompaniment); parental licence<br>of freedom score (1-10 scale)<br><b>Measurement</b><br>Child travel diaries; Parent telephone<br>interview<br><b>Independent variable(s)</b>                                                                                                                                                                     | Child age and degree of mobility licences +<br>associated with CIM to a POS. Ethnicity was<br>also significantly associated with<br>independent trip to POS.                                                                                                                                                                                                                                                                                                        |

|                                                        |                 |                          |                                               |                                                                                                                                                                                                                                                                                                                                                                |                                                                                                                                                    |
|--------------------------------------------------------|-----------------|--------------------------|-----------------------------------------------|----------------------------------------------------------------------------------------------------------------------------------------------------------------------------------------------------------------------------------------------------------------------------------------------------------------------------------------------------------------|----------------------------------------------------------------------------------------------------------------------------------------------------|
|                                                        |                 |                          |                                               | Demographics; Public Open Space (POS) quality/quantity<br><b>Measurement</b><br>Parent telephone interview; POSAI (environmental audit tool)                                                                                                                                                                                                                   |                                                                                                                                                    |
| Christian et al.<br>2014<br>Australia<br><i>TREK</i>   | Cross-sectional | n=727*                   | n=727*<br>10-12 years<br>Years, 5,6,7         | <b>Outcome variable</b><br>CIM (15 local destinations, active independent travel)(0-15 scale)<br><b>Measurement</b><br>Child & parent questionnaire<br><b>Independent variable(s)</b><br>Socio-demographics; Physical activity, local walking and outdoor play; dog walking<br><b>Measurement</b><br>Child & parent questionnaire<br>Accusplit AH120 Pedometer | Dog walkers were more independently mobile than non-dog walkers.                                                                                   |
| Christian et al.<br>2015<br>Australia<br><i>RESIDE</i> | Cross-sectional | n=305*                   | n=181<br>8-15 years                           | <b>Outcome variable</b><br>CIM (parent report; travel to/from various destinations)<br><b>Measurement</b><br>Parent survey<br><b>Independent variable(s)</b><br>Physical environment (GIS), social environment (i.e. neighbourhood perceptions)<br><b>Measurement</b><br>Parent survey                                                                         | Distance (e.g., to school, local park), perception of an unsafe neighbourhood, and unsupportive parenting social norms were – associated with CIM. |
| Christian et al.<br>2016<br>Australia<br><i>RESIDE</i> | Cross-sectional | n=305*                   | n=181<br>8-15 years<br>mean age<br>10.7(±2.1) | <b>Outcome variable</b><br>CIM (parent report; travel to/from various destinations)<br><b>Measurement</b><br>Parent survey<br><b>Independent variable(s)</b><br>Siblings/older siblings; dog ownership<br><b>Measurement</b>                                                                                                                                   | Having an older sibling, older sibling of the same gender, owning a family dog were + associated with CIM to a variety of destinations.            |
| Cordovil et al.<br>2015                                | Cross-sectional | n=1099*<br>Mothers (82%) | n=1099*<br>8-15 years                         | <b>Outcome variable</b>                                                                                                                                                                                                                                                                                                                                        | Age was + associated with CIM. Gender did not influence CIM except in number of                                                                    |

|                                                         |                 |         |                                                                                                                     |                                                                                                                                                                                                                                                                                                                                               |                                                                                                                                                                                                                                                                                                                                  |
|---------------------------------------------------------|-----------------|---------|---------------------------------------------------------------------------------------------------------------------|-----------------------------------------------------------------------------------------------------------------------------------------------------------------------------------------------------------------------------------------------------------------------------------------------------------------------------------------------|----------------------------------------------------------------------------------------------------------------------------------------------------------------------------------------------------------------------------------------------------------------------------------------------------------------------------------|
| Portugal                                                |                 |         | Primary n=660<br>G (51% ); B (49%)<br>mean age =9.8±1.5<br>Secondary n=439<br>G (57%); B (43%)<br>mean age=13.8±1.6 | CIM (mobility licences; travel mode; CIM on weekends)<br><b>Measurement</b><br>Portuguese version of Policy Studies Institute (PSI) international CIM Child & parent questionnaire<br><b>Independent variable(s)</b><br>Socio-demographics; distance home to school; school setting<br><b>Measurement</b><br>PSI Child & parent questionnaire | independent activities done on the weekend. Rural settings were + associated with CIM compared to urban settings. Distance was – associated with CIM, and having no car access was positively associated to CIM.                                                                                                                 |
| Curtis et al.<br>2015<br>Australia                      | Cross-sectional | n=273*  | n=273*<br>9-13 years<br>G (64.8%); B (35.2%)                                                                        | <b>Outcome variable</b><br>CIM (travel mode to school; other locations)<br><b>Measurement</b><br>Child & parent questionnaire<br><b>Independent variable(s)</b><br>Socio-demographics; built environment<br><b>Measurement</b><br>Child & parent questionnaire                                                                                | Distance to school is associated with CIM. Children who actively travel live closer to school and associated with more metropolitan, denser, and more walkable environments. 800 m ped-shed ratio, densities, and distance to school are associated with CIM.                                                                    |
| Delisle Nyström et al.<br>2019<br>Canada<br><i>ATIM</i> | Cross-sectional | n=1699* | n=1699*<br>8-13 years old<br>mean age 10.2±1.0<br>G (n=935); B (n=764)                                              | <b>Outcome variable</b><br>CIM (Hillman mobility licenses; 0-6 scale)<br><b>Measurement</b><br>Survey<br><b>Independent variable(s)</b><br>Socio-demographics; area-level SES; urbanization; site<br><b>Measurement</b><br>Survey                                                                                                             | Area-level SES and urbanization were not associated with CIM. For girls, site (Trois-Rivières) was + associated with CIM. Age was + associated with children's independent mobility licenses. Home ownership was + associated with boy's independent mobility licenses. Parental education was not associated with CIM licenses. |
| Foster et al.<br>2014<br>Australia<br><i>TREK</i>       | Cross-sectional | n=1231* | n=1231*<br>10-12 years                                                                                              | <b>Outcome variable</b><br>CIM (15 local destinations; accompaniment) (0-15 scale)<br><b>Measurement</b><br>Child & parent questionnaire<br><b>Independent variable(s)</b><br>Socio-demographics; informal social control; parental fear of strangers, social                                                                                 | Parental fear of strangers was – associated with CIM. Informal social control was + associated with CIM.                                                                                                                                                                                                                         |

|                                    |                 |                                                                                                               |                                      |                                                                                                                                                                                                                                                                                                                                                                                                                                    |                                                                                                                                                                                                                                                                                                                                                                                                                           |
|------------------------------------|-----------------|---------------------------------------------------------------------------------------------------------------|--------------------------------------|------------------------------------------------------------------------------------------------------------------------------------------------------------------------------------------------------------------------------------------------------------------------------------------------------------------------------------------------------------------------------------------------------------------------------------|---------------------------------------------------------------------------------------------------------------------------------------------------------------------------------------------------------------------------------------------------------------------------------------------------------------------------------------------------------------------------------------------------------------------------|
|                                    |                 |                                                                                                               |                                      | and built environment (GIS) characteristics<br><b>Measurement</b><br>Child & parent questionnaire                                                                                                                                                                                                                                                                                                                                  |                                                                                                                                                                                                                                                                                                                                                                                                                           |
| Fyhri et al.<br>2009<br>Norway     | Cross-sectional | n=1282*<br>F (55%); M (45%)                                                                                   | Children in age range of 6-12 years  | <b>Outcome variable</b><br>CIM (school trip; sport activities; travel mode; accompaniment) (1-9 scale)<br><b>Measurement</b><br>NTS 2005 travel survey parent report<br>Child survey<br><b>Independent variable(s)</b><br>Socio-demographics; distance to various destinations; traffic; parents' experience of safety; child's experience of safety<br><b>Measurement</b><br>NTS 2005 travel survey parent report<br>Child survey | Parents car use, number of cars, and work hours, and distance to school and sports were – associated with CIM. Parents' and children's safety experience on school and leisure trip + associated with CIM. Seasonality was also associated with CIM.                                                                                                                                                                      |
| Ghekiere et al.<br>2017<br>Belgium | Cross-sectional | n=1286*<br>Mothers (77%)                                                                                      | Children in age range of 10-12 years | <b>Outcome variable</b><br>CIM (distance child could cycle alone for transport)<br><b>Measurement</b><br>Parent online questionnaire<br><b>Independent variable(s)</b><br>Demographics; psychosocial factors; neighbourhood environmental perceptions<br><b>Measurement</b><br>Parent online questionnaire                                                                                                                         | Boys had more CIM compared to girls. Parent perceptions of child's cycling and traffic skills, perceptions of neighbourhood traffic safety were + associated with CIM (the latter only true for girls). Age was + associated with CIM. Perceptions of cycling skills + associated with CIM for boys in high urbanized areas. Parental cycling for transport was – associated with CIM among low SES girls.                |
| He et al.<br>2017<br>United States | Cross-sectional | Total school trips n=3172*<br>Total households n=2039<br>Two –parent households n=1491<br>father-headed n=115 | School age children                  | <b>Outcome variable</b><br>CIM (independent trips, alone or with siblings, by non-motorized mode; child driving him or herself; child travelling by bus)<br><b>Measurement</b><br>2001 Southern California Association of Governments (SCAG) Post Census Regional Household Travel Survey<br><b>Independent variable(s)</b>                                                                                                        | Distance to parents' work was + associated with CIM to school, especially for distance to mothers' work place and children walking to school independently. Child age is + associated with walking/cycling independently and driving. Number of siblings and car availability was – associated with CIM and active commuting. Children from low SES households are more likely to take the bus than be chauffeured by the |

|                                          |                 |                                             |                                                               |                                                                                                                                                                                                                                                                                                |                                                                                                                                                                                                                                                                   |
|------------------------------------------|-----------------|---------------------------------------------|---------------------------------------------------------------|------------------------------------------------------------------------------------------------------------------------------------------------------------------------------------------------------------------------------------------------------------------------------------------------|-------------------------------------------------------------------------------------------------------------------------------------------------------------------------------------------------------------------------------------------------------------------|
|                                          |                 | mother-headed n=418<br>Other types n=15     |                                                               | Socio-demographics; Parent employment/working arrangements; distance home, school, parents' workplace<br><b>Measurement</b><br>2001 SCAG Post Census Regional Household Travel Survey                                                                                                          | mother. Single family housing – associated with taking the bus and multi-family residential land + associated with walking/cycling alone or with siblings.                                                                                                        |
| Herrador-Colmenero 2017<br>Spain         | Cross-sectional |                                             | n=652*<br>F (n=313); M (n=339)<br>6-12 years                  | <b>Outcome variable</b><br>CIM (accompaniment on journey to school)<br><b>Measurement</b><br>Questionnaire<br><b>Independent variable(s)</b><br>Socio-demographics; accompaniment mode, safety perceptions, mode of commuting<br><b>Measurement</b><br>Questionnaire                           | Children who were older were more likely to travel independently to school and had better safety perceptions compared to younger children. Accompanied children and less understanding of safety issues compared to children who actively commuted independently. |
| Huertas-Delgado 2018<br>Belgium<br>BEPAS | Cross-sectional | n=291*<br>41.4±8.9 years<br>Mothers (76.5%) | n=291*<br>12-15 years<br>Mean age 13.2±1.0 years<br>G (54.7%) | <b>Outcome variable</b><br>CIM (time spent independently traveling for walking, cycling public transport)<br><b>Measurement</b><br>Questionnaire<br><b>Independent variable(s)</b><br>Socio-demographics; perceived neighbourhood environmental factors<br><b>Measurement</b><br>Questionnaire | Parents reported greater negative perception of traffic and crime related safety. For adolescents, parents' traffic and crime related perceptions were associated with adolescents' IM, but not active IM.                                                        |
| Janssen et al. 2016<br>United States     | Cross-sectional | n=497*<br>American parents                  | Children in age range of 6.9-11.9 years                       | <b>Outcome variable</b><br>CIM (range child can travel; accompaniment)<br><b>Measurement</b><br>Parent survey<br><b>Independent variable(s)</b><br>Socio-demographics; interpersonal/family level characteristics; perceptions of neighbourhood safety<br><b>Measurement</b>                   | Child age and parents' perception of neighbourhood safety were + associated with CIM. Parents' fear of crime was – associated with CIM.                                                                                                                           |

|                                    |                 |                                                            |                                                                                                |                                                                                                                                                                                                                                                                                                                                                     |                                                                                                                                                                                                                                                                                              |
|------------------------------------|-----------------|------------------------------------------------------------|------------------------------------------------------------------------------------------------|-----------------------------------------------------------------------------------------------------------------------------------------------------------------------------------------------------------------------------------------------------------------------------------------------------------------------------------------------------|----------------------------------------------------------------------------------------------------------------------------------------------------------------------------------------------------------------------------------------------------------------------------------------------|
|                                    |                 |                                                            |                                                                                                | Parent survey                                                                                                                                                                                                                                                                                                                                       |                                                                                                                                                                                                                                                                                              |
| Johansson et al.<br>2006<br>Sweden | Cross-sectional | n=357*<br>Mothers (78%)<br>Travel diary completed<br>n=248 | Children in age range of 8-11 years<br>Mean age = 9.6 years<br>G (50%); B (50%)                | <b>Outcome variable</b><br>CIM (Travel mode)<br><b>Measurement</b><br>Parent questionnaire; travel diary<br><b>Independent variable(s)</b><br>Socio-demographics; environmental trust; interpersonal trust; social environment (sense of community); physical environment (traffic, foot/cycle paths)<br><b>Measurement</b><br>Parent questionnaire | Parent attitude toward independent travel (+), traffic environment (+), car access (-), and child age (+) were associated with children's independent journeys.                                                                                                                              |
| Kytta et al.<br>2004<br>Finland    | Cross-sectional | n=223*<br>Finland n=80<br>Belarus n=147                    | n=223*<br>8-9 years<br>Finland n=80<br>Mean age=8.5 years<br>Belarus n=147<br>Mean age=8 years | <b>Outcome variable</b><br>CIM (mobility licences; actual mobility)<br><b>Measurement</b><br>Child questionnaire & interviews; parent questionnaire<br><b>Independent variable(s)</b><br>Socio-demographics; environment characteristics (community type)<br><b>Measurement</b><br>Child questionnaire & interviews; parent questionnaire           | The degree of mobility licence was + associated with children's actual mobility (Finnish data). Degree of urbanisation was – associated with mobility licences. Gender (boy) was + associated with actual mobility (Belarusian data).                                                        |
| Kytta et al.<br>2015<br>Finland    | Cross-sectional | Second sample<br>n=306*                                    | n=821*<br>7-15 years<br>Second sample<br>n=306*<br>8-10 years                                  | <b>Outcome variable</b><br>CIM (mobility licences, actual mobility; independent weekend activities)<br><b>Measurement</b><br>Child & parent survey<br><b>Independent variable(s)</b><br>Socio-demographics; settlement type;<br><b>Measurement</b><br>Child & parent survey                                                                         | Children in suburban and large towns had higher CIM than inner city, small town, and rural children. Child age + associated with CIM. No significant association between genders, except girls in small town setting had fewer mobility licences. Access to a car was – associated with CIM. |
| Lam et al.<br>2014<br>Hong Kong    | Cross-sectional | n=1672*<br>Families<br>Parent-report                       | n=2110<br>6-12 years                                                                           | <b>Outcome variable</b><br>CIM (accompaniment to school; dichotomous variable yes/no)<br><b>Measurement</b><br>Travel Characteristic Survey 2002                                                                                                                                                                                                    | Child age was positively associated with CIM while distance was negatively associated with CIM. Median household income (low SES +), family structure (single parent +), mother's working status (+), employment of                                                                          |

|                                               |                 |                                                  |                                   |                                                                                                                                                                                                                                                                                                                                                                            |                                                                                                                                                                                                                                                                                                                                                          |
|-----------------------------------------------|-----------------|--------------------------------------------------|-----------------------------------|----------------------------------------------------------------------------------------------------------------------------------------------------------------------------------------------------------------------------------------------------------------------------------------------------------------------------------------------------------------------------|----------------------------------------------------------------------------------------------------------------------------------------------------------------------------------------------------------------------------------------------------------------------------------------------------------------------------------------------------------|
|                                               |                 |                                                  |                                   | <b>Independent variable(s)</b><br>Socio-demographics, family, environmental characteristics<br><b>Measurement</b><br>Travel Characteristic Survey 2002                                                                                                                                                                                                                     | a domestic helper (-), neighborhood settlement type (rural +), and density of school places.                                                                                                                                                                                                                                                             |
| Larsen et al. 2015<br>Canada                  | Cross-sectional | n=1016<br>Final sample with complete data n=559* | Children of elementary school age | <b>Outcome variable</b><br>CIM (walking independently)<br><b>Measurement</b><br>Telephone survey on school travel<br><b>Independent variable(s)</b><br>Socio-demographics; social environment; environment characteristics (GIS)<br><b>Measurement</b><br>Telephone survey on school travel                                                                                | Child's age was + associated with CIM. Population density was – associated with independent walking. Neighbourhood age was associated with CIM in that location of one's home modifies the relationship between age and CIM. Intersection density was – related to travel mode (walking). Distance was – associated with children walking (vs. driving). |
| Lin et al. 2017<br>New Zealand<br><i>KITC</i> | Cross-sectional | n=239*                                           | n=254*<br>8-13 years              | <b>Outcome variable</b><br>CIM (travel mode and accompaniment)<br><b>Measurement</b><br>Travel diary<br>Parent computer-aided telephone interview<br><b>Independent variable(s)</b><br>Perceptions of neighbourhood safety, cohesion, connection<br>Built environment<br><b>Measurement</b><br>Parent computer-aided telephone interview<br>Objective measures ArcInfo 9.3 | Parental perceptions of neighbourhood cohesiveness and connectedness were positively associated with CIM. Proximity to school was also associated with independent trips.                                                                                                                                                                                |
| Loo et al. 2015<br>Hong Kong                  | Cross-sectional | n=2110                                           | n=2110*<br>6-12 years             | <b>Outcome variable</b><br>CIM (independent trips to school)<br><b>Measurement</b><br>Travel Characteristics Survey 2002<br><b>Independent variable(s)</b><br>Socio-demographics and environmental characteristics<br><b>Measurement</b><br>Travel Characteristics Survey 2002                                                                                             | Children from higher SES households were more likely to have less independent trips to school.                                                                                                                                                                                                                                                           |

|                                  |                 |                                                                            |                                                          |                                                                                                                                                                                                                                                                                                                                         |                                                                                                                                                                                                                                                                                                                                                               |
|----------------------------------|-----------------|----------------------------------------------------------------------------|----------------------------------------------------------|-----------------------------------------------------------------------------------------------------------------------------------------------------------------------------------------------------------------------------------------------------------------------------------------------------------------------------------------|---------------------------------------------------------------------------------------------------------------------------------------------------------------------------------------------------------------------------------------------------------------------------------------------------------------------------------------------------------------|
| Lopes et al.<br>2014<br>Portugal | Cross-sectional | n=1099*                                                                    | n=1099* (16 schools)<br>9-14 years<br>Grade 3-10         | <b>Outcome variable</b><br>CIM<br><b>Measurement</b><br>International child independent mobility questionnaires<br><b>Independent variable(s)</b><br>Socio-demographics<br>Psychosocial factors (Fear perceptions, sense of community)<br>Urbanization<br><b>Measurement</b><br>International child independent mobility questionnaires | Increasing urbanization decreased the odds of independent mobility. Parental fear of traffic and stranger danger were commonly cited concerns for parents.                                                                                                                                                                                                    |
| Love et al.<br>2020              | Longitudinal    | n=1136*                                                                    | n=1136*<br>9-12 years<br>G (n=570); B (n=552)            | <b>Outcome variable</b><br>CIM (to/from school; binary independent vs. not independent)<br><b>Measurement</b><br>Survey<br><b>Independent variable(s)</b><br>Individual level, social capital at neighbourhood/school community level; objective/perceived neighbourhood built environment<br><b>Measurement</b><br>Survey              | A number of factors were significantly associated with change in CIM including mode of travel at baseline (+), number of independent weekend trips (+), and social capital factors like child knowing neighbours well (+) and parents perceiving that neighbours are willing to help each other (+) were associated with increased CIM on the school journey. |
| Mammen et al.<br>2012<br>Canada  | Cross-sectional | n=1016<br>n=490* (lived within 2km of school used for analysis)<br>Parents | 6-14 years<br>Unescorted walkers<br>G (52.3%); B (47.7%) | <b>Outcome variable</b><br>CIM (travel mode reported as escorted vs. unescorted)<br><b>Measurement</b><br>Self-reported survey by Metrolinkx<br><b>Independent variable(s)</b><br>Socio-demographics<br>Parental attitudes/perceptions toward active school travel<br><b>Measurement</b><br>Self-reported survey by Metrolinkx          | Unescorted children were significantly older, English predominantly spoken at home, and lived closer to school. Parental fears of stranger danger and bullying were associated with children being escorted to school.                                                                                                                                        |
| Mitra et al.<br>2014             | Cross-sectional | n=795*                                                                     | Grade 5 and 6                                            | <b>Outcome variable</b><br>CIM                                                                                                                                                                                                                                                                                                          | Positive parental neighbourhood perceptions of safety increased chances of                                                                                                                                                                                                                                                                                    |

|                                 |                     |                                        |                                                          |                                                                                                                                                                                                                                                                                                                                                                                                                               |                                                                                                                                                                                                                                                                                             |
|---------------------------------|---------------------|----------------------------------------|----------------------------------------------------------|-------------------------------------------------------------------------------------------------------------------------------------------------------------------------------------------------------------------------------------------------------------------------------------------------------------------------------------------------------------------------------------------------------------------------------|---------------------------------------------------------------------------------------------------------------------------------------------------------------------------------------------------------------------------------------------------------------------------------------------|
| Canada<br><i>BEAT</i>           |                     | n=686 (valid<br>accelerometry<br>data) | G (53.46%); B<br>(46.54%)                                | <b>Measurement</b><br>Questionnaire<br><b>Independent variable(s)</b><br>Socio-demographics, Parental attitudes<br>toward transportation mode; perceptions<br>of neighbourhood environment<br>Physical activity<br><b>Measurement</b><br>Questionnaire<br>Accelerometry                                                                                                                                                       | children's IM. Boys and older children more<br>likely to have more IM than girls and<br>younger children.                                                                                                                                                                                   |
| Pacilli et al.<br>2013<br>Italy | Cross-<br>sectional | n=589*<br>Parents                      | n=589*<br>10-15 years<br>G (49%); B (51%)                | <b>Outcome variable</b><br>CIM (7 questions; did not refer to school<br>route)<br><b>Measurement</b><br>Questionnaire (Child)<br><b>Independent variable(s)</b><br>Socio-demographics, environmental,<br>psychosocial characteristics<br>Sense of community (Child)<br>Parenting style (Parent)<br><b>Measurement</b><br>Questionnaire (Child & Parent)<br>Parental Styles Scale (Parent)                                     | Age was + associated with IM, while gender<br>(i.e. female) was – associated with IM.                                                                                                                                                                                                       |
| Prezza et al.<br>2001<br>Italy  | Cross-<br>sectional | n=251*<br>Mothers<br>Mean age 39       | n=251<br>7-12 years<br>Mean age 9.41<br>G (47%); B (53%) | <b>Outcome variable</b><br>CIM (to/from school; outside play;<br>to/from destinations; overall score from<br>5 partial scores)<br><b>Measurement</b><br>Semi-structured interview<br><b>Independent variable(s)</b><br>Neighbourhood relations/sense of<br>community<br>Environmental factors<br><b>Measurement</b><br>Child's frequentation of peers<br>Neighbourhood Relations Scale<br>Italian Scale of Sense of Community | Older children and boys have significantly<br>higher IM compared to younger children and<br>girls. Greater IM was also experience by<br>children whose mothers had stronger<br>neighbourhood relations, lived in a building<br>with a courtyard, near a park, or in a new<br>neighbourhood. |

|                                                   |                 |                                                                                                       |                                                                                                        |                                                                                                                                                                                                                                                                                                     |                                                                                                                                                                                                                                                                                                                                                                                                                                                                                              |
|---------------------------------------------------|-----------------|-------------------------------------------------------------------------------------------------------|--------------------------------------------------------------------------------------------------------|-----------------------------------------------------------------------------------------------------------------------------------------------------------------------------------------------------------------------------------------------------------------------------------------------------|----------------------------------------------------------------------------------------------------------------------------------------------------------------------------------------------------------------------------------------------------------------------------------------------------------------------------------------------------------------------------------------------------------------------------------------------------------------------------------------------|
| Riazi et al.<br>2019<br>Canada<br><i>ATIM</i>     | Cross-sectional | n=1699*<br>Mothers (80.9%)<br>30-44 years (68.9%)                                                     | N=1699*<br>Mean age 10.21±0.98<br>G (55.1%); B (44.9%)                                                 | <b>Outcome variable</b><br>CIM (Hillman 6 mobility licenses; CIM index 0-6)<br><b>Measurement</b><br>Survey (parent)<br><b>Independent variable(s)</b><br>Socio-demographics, social environment factors, physical and built environment factors<br><b>Measurement</b><br>Survey (Child and Parent) | Individual correlates of CIM included child grade level (+), language spoken at home (-), car ownership (-), and phone ownership (+). For boys, parental gender was negatively associated with CIM. Parental perceptions of safety and environment were significantly associated with CIM. Location was significantly associated with CIM and suburban environments were (-) associated with boys' independent mobility and walkability was (+) associated with girls' independent mobility. |
| Santos et al.<br>2013<br>Portugal<br><i>SALTA</i> | Cross-sectional | n=354*<br>Mothers (74%); Fathers (23.2%)                                                              | n=354*<br>Mean age 11.63(.85)<br>G (66%); B (44%)                                                      | <b>Outcome variable</b><br>CIM (child report visitation/accompaniment of 11 destinations (5 point Likert scale))<br><b>Measurement</b><br>Survey (Child)<br><b>Independent variable(s)</b><br>Parental PA<br>Perceptions of neighbourhood safety<br><b>Measurement</b><br>Survey (Parent)<br>IPAQ   | Parents' PA and perception of sidewalk and street safety were significantly associated with children's IM.                                                                                                                                                                                                                                                                                                                                                                                   |
| Scheiner et al.<br>2019<br>Germany                | Cross-sectional | n=605*<br>morning trip; n=594<br>afternoon trip (described as net sample)<br>*demographics unreported | n=605 morning trip; n=594 afternoon trip (described as net sample)<br>6-11 years<br>Mean age 7.87±1.28 | <b>Outcome variable</b><br>CIM (escort mode to and from school)<br><b>Measurement</b><br>Questionnaire<br><b>Independent variable(s)</b><br>Sociodemographic, transport, built environment, traffic safety, parental concerns, perceptions, attitudes<br><b>Measurement</b><br>Questionnaire        | A number of individual, interpersonal, social, and built environment level factors were associated with the odds of being escorted to and from school. More built environment variables were associated with the trip to school but not the afternoon trip, while more attitudinal variables were associated with the trip from school.                                                                                                                                                      |

|                                                                                   |                 |                                                                                                   |                                                                                                              |                                                                                                                                                                                                                                                                                                                        |                                                                                                                                                                                                                                                                                                                                                             |
|-----------------------------------------------------------------------------------|-----------------|---------------------------------------------------------------------------------------------------|--------------------------------------------------------------------------------------------------------------|------------------------------------------------------------------------------------------------------------------------------------------------------------------------------------------------------------------------------------------------------------------------------------------------------------------------|-------------------------------------------------------------------------------------------------------------------------------------------------------------------------------------------------------------------------------------------------------------------------------------------------------------------------------------------------------------|
| Schoeppe et al.<br>(a)<br>2016<br>Australia                                       | Cross-sectional | Data drawn from*<br>1991: n=1360<br>1993: n=298<br>2010: n=341<br>2011: n=113<br>2012: n=301      | 8-13 years*<br>Mean age 10 years<br>1991: n=1273<br>1993: n=476<br>2010: n=421<br>2011: n=131<br>2012: n=305 | <b>Outcome variable</b><br>CIM (child actual mobility; parent licences for IM)<br><b>Measurement</b><br>Surveys (Child & Parent)                                                                                                                                                                                       | Younger children and girls were less likely to travel to from home to school independently. Overall, the findings suggest that IM has declined in Australian children from 1991 to 2012.                                                                                                                                                                    |
| Schoeppe et al.<br>(b)<br>2016<br>Australia                                       | Cross-sectional | n=1293* (1164 with complete data)<br>Australian adults<br>Mean age 55.8(15.6)<br>F (48%); M (52%) | 8-12 years                                                                                                   | <b>Outcome variable</b><br>CIM (adult attitudes on distances child should be able to travel/play outdoors independently)<br><b>Measurement</b><br>Queensland Social Survey (QSS)<br><b>Independent variable(s)</b><br>Demographics, adult attitudes<br><b>Measurement</b><br>Queensland Social Survey (QSS)            | More than half of adults (62%) would restrict children's independent travel to <500m from home and 74% of adults would restrict children's independent outdoor play to <500m from home. Women and adults with lower education were more likely to restrict IM (travel & play) to shorter distances (<500m).                                                 |
| Sharmin et al.<br>2020<br>Bangladesh                                              | Cross-sectional | n=151*<br>Majority of parents in 30-45 age range<br>F (62.3%); M (34.4%); other (3.3%)            | n=151*<br>10-14 years<br>Mean age 12.5 years<br>G (53%); B (47%)                                             | <b>Outcome variable</b><br>CIM (accompaniment of each trip)<br><b>Measurement</b><br>Travel diary<br><b>Independent variable(s)</b><br>Socio-demographics, built environment (geographic and topological data)<br><b>Measurement</b><br>Questionnaire, travel diary, geographic and topological built environment data | A number of geographic and topological built environment factors are associated with CIM but affect discretionary (angular integration (-), recreational land use (+), and traffic composition along route (+)) and non-discretionary (i.e. step-depth (-), angular connectivity (-); presence of institutional land use (-)) independent trips differently |
| Smith et al.<br>2019<br>New Zealand<br><i>Neighbourhood for Active Kids study</i> | Cross-sectional | n=931*                                                                                            | n=931<br>5-11 years (52.2%);<br>10-13 years (47.8%)<br>F (49.6%); M (50.4%)                                  | <b>Outcome variable</b><br>CIM (6 licenses)<br><b>Measurement</b><br>CATI Computer-aided telephone interview mapping survey<br><b>Independent variable(s)</b><br>Socio-demographics; neighbourhood-built environment measures                                                                                          | No significant differences were observed between objective neighbourhood-built environment measures and parents' reported needs. However, objectively assessed (-) and parent-reported need (+) for cycling infrastructure were associated with parental license.                                                                                           |

|                                                    |                                                              |                                              |                                                                                           |                                                                                                                                                                                                                                                                                                                                                         |                                                                                                                                                                                                                                                                                     |
|----------------------------------------------------|--------------------------------------------------------------|----------------------------------------------|-------------------------------------------------------------------------------------------|---------------------------------------------------------------------------------------------------------------------------------------------------------------------------------------------------------------------------------------------------------------------------------------------------------------------------------------------------------|-------------------------------------------------------------------------------------------------------------------------------------------------------------------------------------------------------------------------------------------------------------------------------------|
|                                                    |                                                              |                                              |                                                                                           | <b>Measurement</b><br>CATI Computer-aided telephone interview mapping survey; objective built environment features ArcMap 10.5, Auckland Transport's Open GIS Data                                                                                                                                                                                      |                                                                                                                                                                                                                                                                                     |
| Stark<br>2018<br>Austria                           | Cross-sectional                                              | n=380*                                       | n=380*<br>6-9 years<br>G (49%)                                                            | <b>Outcome variable</b><br>CIM (mobility licenses)<br><b>Measurement</b><br>Survey; travel diary<br><b>Independent variable(s)</b><br>Socio-demographics; parents' occupation; car ownership; frequency of accompaniment to school and travel modes<br><b>Measurement</b><br>Survey                                                                     | Parents' attitudes towards active independent mobility influence children's travel patterns as well as distance, age, type of school are also associated.                                                                                                                           |
| Veitch et al.<br>2008<br>Australia                 | Cross-sectional                                              |                                              | n=212*<br>8-12 years<br>8-9 years (49%); 10-12 years (51%)<br>G (51%); B (49%)            | <b>Outcome variable</b><br>CIM (child report were walk/ride without adult)<br><b>Measurement</b><br>Survey (Child)<br>Behavioural maps of neighbourhood (Child)<br><b>Independent variable(s)</b><br>Individual characteristics<br>Distance (direct/computer generated measurement)<br><b>Measurement</b><br>Survey (Child)<br>Mapping activity (Child) | Older children (vs. younger children) were more likely to go to 3+ places independently. Children in lower SES environments reported higher IM in number of locations visited and distance traveled.                                                                                |
| Veitch et al.<br>2017<br>Australia<br><i>READI</i> | Longitudinal<br>Baseline (2007-08)<br>T1 (2010)<br>T2 (2012) | n=311 (T1)*<br>Mothers<br>Mean age 41.3(8.4) | n=311 (T1)*<br>n=207 (T2)*;<br>184/179 analyzed (local destinations/school)<br>5-12 years | <b>Outcome variable</b><br>CIM (child report travel mode for trips to school, active/nonactive, accompaniment; 4 destinations (0-10 scale); walking/cycling to local destinations (0-20 scale))<br><b>Measurement</b>                                                                                                                                   | Parental perceptions of safety, distance to walking and tracks and enjoyment of walking/cycling were longitudinally associated with IM on the school journey. Mother and child's agreement that other children they know walk/cycle to school was also + associated with IM travel. |

|                                                       |                     |                            |                                                      |                                                                                                                                                                                                                                                                                                                                                                                                                                    |                                                                                                                                                                                                                                                                                                                                                                        |
|-------------------------------------------------------|---------------------|----------------------------|------------------------------------------------------|------------------------------------------------------------------------------------------------------------------------------------------------------------------------------------------------------------------------------------------------------------------------------------------------------------------------------------------------------------------------------------------------------------------------------------|------------------------------------------------------------------------------------------------------------------------------------------------------------------------------------------------------------------------------------------------------------------------------------------------------------------------------------------------------------------------|
|                                                       |                     |                            | Mean age<br>12(2.1)(T1)<br>G (55%); B (45%)          | Questionnaire (Child)(T1 & T2)<br><b>Independent variable(s)</b><br>Objective measures of neighbourhood<br>(GIS)<br>Individual, social, Perceived<br>neighbourhood attributes<br><b>Measurement</b><br>Survey (Mother)(T1)                                                                                                                                                                                                         |                                                                                                                                                                                                                                                                                                                                                                        |
| Villanueva et al.<br>2012<br>Australia<br><i>TREK</i> | Cross-<br>sectional | n=1314*                    | n=1480*<br>10-12 years<br>G (51%); B (49%)           | <b>Outcome variable</b><br>CIM (15 activities; child report<br>participation/visitation; parent report<br>accompaniment)(0-15 scale)<br><b>Measurement</b><br>Questionnaire (2007)(Child & Parent)<br><b>Independent variable(s)</b><br>Objective environmental factors (GIS)<br>Perceived social, individual,<br>environmental factors (Child & Parent)<br><b>Measurement</b><br>Questionnaire (2007)<br>Mapping activity (Child) | Parents' perceptions of living near a busy<br>road, decreased odds of children's IM. Girls<br>who lived in well-connected and low traffic<br>neighbourhoods had increased IM. Boys<br>who had access to local recreation or retail<br>destination also experienced higher IM. Boys<br>who lived near shopping centers or<br>community services had lower levels of IM. |
| Villanueva et al.<br>2014<br>Australia<br><i>TREK</i> | Cross-<br>sectional | n=1314 *                   | n=1480 *<br>10-12 years<br>G (52%); B (48%)          | <b>Outcome variable</b><br>CIM (15 activities; child report<br>participation/visitation; parent report<br>accompaniment)(0-15 scale)<br><b>Measurement</b><br>Questionnaire (2007)(Child & Parent)<br><b>Independent variable(s)</b><br>School-specific walkability index (GIS)<br>Perceived social, individual,<br>environmental factors (Child & Parent)<br><b>Measurement</b><br>Questionnaire (2007)                           | High walkability was + associated with girls'<br>IM. Parents' and child's confidence in child's<br>ability to walk independently was *<br>associated with higher levels of IM. Parent<br>perceptions of safe neighbourhood road<br>crossings were + associated with boys' IM.                                                                                          |
| Vlaar et al.<br>2019<br>Canada                        | Cross-<br>sectional | n=105*<br>Mean age<br>45±5 | n=105*<br>Child grade 6±1<br>G (50.5%); B<br>(49.5%) | <b>Outcome variable</b><br>CIM (territorial range area and distance)<br><b>Measurement</b><br>ArcGIS (7-day location and activity<br>profiles); Questionnaire                                                                                                                                                                                                                                                                      | License for CIM and roaming allowance were<br>mediators between perceived walking<br>facilities, crime safety, and neighbourhood<br>relations, and children's territorial range.                                                                                                                                                                                       |

|                                    |                 |                              |                                                     |                                                                                                                                                                                                                                                                                                               |                                                                                                                                                                                                                      |
|------------------------------------|-----------------|------------------------------|-----------------------------------------------------|---------------------------------------------------------------------------------------------------------------------------------------------------------------------------------------------------------------------------------------------------------------------------------------------------------------|----------------------------------------------------------------------------------------------------------------------------------------------------------------------------------------------------------------------|
|                                    |                 | Female (85.7%); Male (14.3%) |                                                     | <b>Independent variable(s)</b><br>Socio-demographics; Parental perceptions of neighbourhood environment; CIM parenting practices (license for CIM); Neighbourhood Environment walkability scale; Parent-reported children's roaming allowance<br><b>Measurement</b><br>Questionnaire                          |                                                                                                                                                                                                                      |
| Wolfe et al. 2016<br>United States | Cross-sectional | n=305 *                      | 10-14 years<br>Mean age 12(1.4)<br>G (51%); B (49%) | <b>Outcome variable</b><br>CIM (7 mobility licenses) (0-7 scale)<br><b>Measurement</b><br>Survey (2006-2007) (Parent)<br><b>Independent variable(s)</b><br>Parental perceptions of environment<br>Built environment<br>Child & household characteristics<br><b>Measurement</b><br>Survey (2006-2007) (Parent) | Age is + associated with CIM and Hispanic children experience more restrictions of IM. Parental perceptions of social cohesion and safety are + associated with CIM. Housing unit density was + associated with CIM. |

Positive association: +; Negative association: -; Children's independent mobility: CIM; Physical activity: PA; Girl: G; Boy: B; Female: F; Male: M; Time point 1: T1; Time point 2: T2; International physical activity questionnaire: IPAQ; Geographic Information Systems software: GIS; Resilience for Eating and Activity Despite Inequality: READ; Kids in the City: KITC; Environmental Support for Leisure and Active Transport: SALTA; RESidential Environment Study: RESIDE; Millennium Cohort Study: MCS; Active Transportation Independent Mobility Study: ATIM; Belgian Environmental Physical Activity Study: BEPAS; \* indicates from whom data were collected

**Table S3.** Summary of criteria for quality assessment of included studies

| <b>Criteria</b>                 | <b>Description</b>                                                                                                                                                                         | <b>N (%)</b> |
|---------------------------------|--------------------------------------------------------------------------------------------------------------------------------------------------------------------------------------------|--------------|
| Objectives                      | Were the objectives or hypotheses of the research stated?                                                                                                                                  | 53 (100)     |
| Study design                    | Was the study design appropriate for the research undertaken (e.g., cross sectional or longitudinal study, or intervention study with cross sectional analysis)                            | 53 (100)     |
| Target population               | Was the target population defined?                                                                                                                                                         | 53 (100)     |
| Random sample                   | Was a random sample of the target population taken?                                                                                                                                        | 16 (30)      |
| Response rate                   | Was the response rate 60% or more?                                                                                                                                                         | 20 (38)      |
| Participant selection           | Was the participant selection described?                                                                                                                                                   | 53 (100)     |
| Participant recruitment         | Was the participant recruitment described or referred to?                                                                                                                                  | 53 (100)     |
| Participant numbers             | Were the numbers of participants at each stage of the study reported? (authors should report at least numbers eligible, numbers recruited, numbers included/excluded from analysis)        | 52 (98)      |
| Participant inclusion/exclusion | Were criteria for inclusion and/or exclusion of participants in the analysis used?                                                                                                         | 41 (77)      |
| Study population                | Was the study population sufficiently described? (minimum description =sample size, gender, age and an indicator of socioeconomic status)                                                  | 53 (100)     |
| Variables                       | Were the measures of IM described?                                                                                                                                                         | 53 (100)     |
| Data sources                    | Did the authors describe the source of their data? (e.g. questionnaire, survey, interview, focus group, direct observation, accelerometry, GPS)                                            | 53 (100)     |
| Data collection                 | Did the authors describe how the data were collected? (e.g. by mail, computer, face to face, objective measurement)                                                                        | 53 (100)     |
| Measurement (IM)                | Were reliable and valid measures of IM used?                                                                                                                                               | 19 (36)      |
| Statistical methods             | Were appropriate statistical methods used and described?                                                                                                                                   | 53 (100)     |
| Adjustments                     | Were covariates/confounders controlled for in the analysis? (the authors should present confounder-adjusted estimates)                                                                     | 45 (85)      |
| Missing data                    | Were the numbers/percentages of participants with missing data for IM reported AND did at least 80% of enrolled participants provide complete data in order to be included in the analysis | 23 (43)      |

Criteria for quality assessment and number (%) of studies scoring points (either 0.5 or 1) for each criterion.

**Table S4.** Associations of social-ecological correlates of children's independent mobility

|                                         |                 | Related to Children's Independent Mobility                                                                                                                                                                                                                                                                                                                                                                                                                                                                                                                                                                                                                                                                                                                                |                     |                                                                                                                                                                                                                                                   | Summary Code |                    |           |
|-----------------------------------------|-----------------|---------------------------------------------------------------------------------------------------------------------------------------------------------------------------------------------------------------------------------------------------------------------------------------------------------------------------------------------------------------------------------------------------------------------------------------------------------------------------------------------------------------------------------------------------------------------------------------------------------------------------------------------------------------------------------------------------------------------------------------------------------------------------|---------------------|---------------------------------------------------------------------------------------------------------------------------------------------------------------------------------------------------------------------------------------------------|--------------|--------------------|-----------|
|                                         | Correlate of IM | Studies                                                                                                                                                                                                                                                                                                                                                                                                                                                                                                                                                                                                                                                                                                                                                                   | Association (- / +) | Unrelated to Children's Independent Mobility                                                                                                                                                                                                      | Association  | Related/ Unrelated | % Studies |
| <b>Individual Child Characteristics</b> |                 |                                                                                                                                                                                                                                                                                                                                                                                                                                                                                                                                                                                                                                                                                                                                                                           |                     |                                                                                                                                                                                                                                                   |              |                    |           |
|                                         | Age             | Aggio et al. 2017; Alparone et al., 2012; Ayllón et al. 2019; Ayllón et al. 2020 (i, ii) ; Broberg et al. 2013 <i>b</i> ; Buliung et al. 2017; Carver et al. 2012; Cervesato et al. 2019 (i, ii); Chaudhury et al. 2017; Christian et al. 2015 (i,ii), 2016; Cordovil et al., 2015; Delisle Nyström et al. 2019 ; Fyhri et al. 2009; Ghekiere et al. 2017; He et al. 2017; Herrador-Colmenero et al., 2017; Janssen et al. 2016; Johansson, 2006 (i,ii); Kyttä et al. 2015 (i-iii); Lam et al. 2014; Larsen et al. 2015; Love et al. 2020 (T1) ; Mammen et al. 2012; Mitra et al. 2014; Pacilli et al. 2013; Prezza et al. 2001; Scheiner et al. 2019 (i, ii) ; Sharmin et al. 2020 ; Smith et al. 2019 ; Stark et al. 2018; Veitch et al. 2008 (i,ii); Wolfe et al. 2016 | +                   | Ayllón et al. 2020; Broberg et al. 2013 <i>a</i> ; Carver et al. 2013; Cervesato et al. 2019 (i) Herrador-Colmenero et al. 2017; Lin et al. 2017 ; Love et al. 2020 (T2) ; Sharmin et al. 2020                                                    | ++           | 42/52              | 81%       |
|                                         |                 | Carver et al. 2013; Cervesato et al. 2019                                                                                                                                                                                                                                                                                                                                                                                                                                                                                                                                                                                                                                                                                                                                 | -                   |                                                                                                                                                                                                                                                   |              |                    |           |
|                                         | Gender (boy)    | Aggio et al., 2017; Alparone et al. 2012; Broberg et al. 2013 <i>a</i> ; Carver et al. 2012, 2013 (Australia), 2014; Christian et al. 2015, 2016; Cordovil et al. 2015 (i,ii); Delisle Nyström et al. 2019 ; Fyhri et al. 2009; Ghekiere et al. 2017; Kyttä, 2004 (Belarus); Lopes et al. 2014 (i,ii); Mitra et al. 2014; Pacilli et al. 2013;                                                                                                                                                                                                                                                                                                                                                                                                                            | +                   | Ayllón et al. 2019 ; Ayllón et al. 2020 ; Bhosale et al. 2017 (i,ii); Broberg et al. 2013 <i>b</i> ; R. N. Buliung et al. 2017; Carver et al. 2013; Cervesato et al. 2019; Chaudhury et al. 2017; He et al. 2017; Herrador-Colmenero et al. 2017; | ??           | 27/54              | 50%       |

[illegible]

|                                 |                                                      |                                                                                                        |   |                                                                                                                                                                                                     |    |      |     |
|---------------------------------|------------------------------------------------------|--------------------------------------------------------------------------------------------------------|---|-----------------------------------------------------------------------------------------------------------------------------------------------------------------------------------------------------|----|------|-----|
| <i>Parents' Characteristics</i> | Parent age                                           | Ayllón et al. 2019                                                                                     | + | Christian et al. 2015; Ghekiere et al. 2017; Schoeppe et al. 2016 <i>b</i> ; Riazi et al. 2019 (b ; g)                                                                                              | 00 | 1/6  | 17% |
|                                 | Parent gender                                        | Schoeppe et al., 2016 <i>b</i> (Women); Riazi et al. 2019 (Women; b)                                   | - | Christian et al. 2015; Ghekiere et al. 2017 ; Riazi et al. 2019 (g)                                                                                                                                 | ?? | 2/5  | 40% |
|                                 | Parent educational level                             | Schoeppe et al. 2016 <i>b</i> (Low)                                                                    | - | Ayllón et al 2019 ; Christian et al. 2015; Delisle Nyström et al. 2019 ; Fyhri et al. 2009; Janssen et al. 2016 ; Love et al. 2020 (T2) ; Riazi et al. 2019 (b ; g)                                 | 00 | 1/9  | 11% |
|                                 | Socioeconomic status (Low)                           | Aggio et al. 2017; He et al. 2017 (i-iii); Lam et al. 2014 (i,ii); Loo et al. 2015                     | + | Cervesato et al. 2019 (i, ii); Ghekiere et al. 2017; Janssen et al. 2016; Mammen et al. 2012; Wolfe et al. 2016                                                                                     | ?? | 7/13 | 54% |
|                                 | Work status or employment status                     | Ayllón et al. 2019 (Mother); He et al. 2017 (i-iv); Scheiner et al. 2019 (i, ii)                       | + | Ayllón et al. 2019 (Father); Fyhri et al. 2009; He et al. 2017 (Father); Mammen et al. 2012; Mitra et al. 2014; Stark et al. 2018 (Father) ; Scheiner et al. 2019 (i, ii); Riazi et al. 2019 (b; g) | ?? | 7/20 | 37% |
|                                 |                                                      | Buliung et al. 2017 (Parent; stay-at-home father)(i,ii); Kytä et al. 2015                              | - |                                                                                                                                                                                                     |    |      |     |
|                                 | Parents' perception of child confidence              | Ayllón et al. 2019; Ghekiere et al. 2017 (i,ii); Villanueva et al. 2012, 2014; Scheiner et al. (i, ii) | + | Veitch et al. 2017(i,ii)                                                                                                                                                                            | ++ | 7/10 | 70% |
|                                 |                                                      | Ayllón et al. 2019; Curtis et al., 2015                                                                | - |                                                                                                                                                                                                     |    |      |     |
|                                 | Parents' perception of active school travel benefits | Mammen et al. 2012(i, ii)                                                                              | + | Mammen et al. 2012 (i-iii)                                                                                                                                                                          | ?? | 2/5  | 40% |

|                                  |                                                     |                                                                                                                                                                                                                            |   |                                                                                                                        |    |       |     |
|----------------------------------|-----------------------------------------------------|----------------------------------------------------------------------------------------------------------------------------------------------------------------------------------------------------------------------------|---|------------------------------------------------------------------------------------------------------------------------|----|-------|-----|
|                                  | Parents' attitude toward independent mobility       | Ayllón et al. 2019; Alparone et al. 2012; Curtis et al. 2015; Johansson, 2006; Mitra et al. 2014                                                                                                                           | + |                                                                                                                        | ++ | 5/7   | 71% |
|                                  |                                                     | Ayllón et al. 2019; Curtis et al. 2015                                                                                                                                                                                     | - |                                                                                                                        |    |       |     |
|                                  | Encouragement                                       | Carver et al. 2014 (T2, g)                                                                                                                                                                                                 | - | Carver et al. 2014 (i,ii); Ghekiere et al. 2017 (i-iii)                                                                | 00 | 1/6   | 17% |
| <i>Parents' Behaviour</i>        | Parents' PA level                                   | Santos et al. 2013                                                                                                                                                                                                         | + | Ghekiere et al. 2017; Janssen et al. 2016 (i,ii)                                                                       | 00 | 1/4   | 25% |
|                                  | Parents' policies regarding independent play/travel | Carver et al. 2014 (T1, T2, b)                                                                                                                                                                                             | + | Carver et al. 2014                                                                                                     | ?? | 2/5   | 40% |
|                                  |                                                     | Carver et al. 2012 (g); Scheiner et al 2019 (i,ii)                                                                                                                                                                         | - |                                                                                                                        |    |       |     |
|                                  | Travel mode                                         | Riazi et al. 2019 (b)                                                                                                                                                                                                      | + | Riazi et al. 2019 (b, i-iii; g, i-iv)                                                                                  | 0  | 1/77  | 14% |
| <i>Household characteristics</i> | Household structure                                 | Cervesato et al. 2019                                                                                                                                                                                                      | - | Cervesato et al. 2019 ; Janssen et al., 2016; Schoeppe et al., 2016b; Scheiner et al. 2019 ; Wolfe et al., 2016 (i,ii) | 00 | 1/7   | 14% |
|                                  | Sibling(s)                                          | Ayllón et al. 2019 ; Carver et al. 2014 (T1); Cervesato et al. 2019 (i, ii, iii); Christian et al. 2015 (i,ii), 2016 (i-xi); Johansson, 2006; Lin et al. 2017 ; Scheiner et al. 2019 (i, ii) ; Sharmin et al. 2010 (i, ii) | + | Christian et al. 2015; He & Giuliano, 2017; Janssen et al. 2016; Riazi et al. 2019 (b; g); Wolfe et al. 2016           | ++ | 24/31 | 77% |
|                                  |                                                     | Loo et al., 2015                                                                                                                                                                                                           | - |                                                                                                                        |    |       |     |
|                                  | Birth order                                         | Alparone et al. 2012; Ayllón et al. 2019; Prezza et al. 2001                                                                                                                                                               |   |                                                                                                                        | +  | 2/3   | 67% |
| <b>Social environment</b>        |                                                     |                                                                                                                                                                                                                            |   |                                                                                                                        |    |       |     |
| <i>Children's perceptions</i>    | Children's positive perceptions of safety           | Buliung et al. 2017; Herrador-Colmenero et al. 2017; Love et al. 2020 (T2) ; Villanueva et al. 2012 (g), 2014                                                                                                              | + | Huertas-Delgado et al. 2018(i-iv) ; Riazi et al. 2019 (b; g)                                                           | ?? | 5/11  | 45% |
|                                  | Children's negative perceptions of safety           |                                                                                                                                                                                                                            |   | Buliung et al. 2017; Huertas-Delgado et al.                                                                            | 00 | 0/15  | 0%  |

|                             |                                         |                                                                                                                                                                                               |   |                                                                                                                                                                                    |    |       |     |
|-----------------------------|-----------------------------------------|-----------------------------------------------------------------------------------------------------------------------------------------------------------------------------------------------|---|------------------------------------------------------------------------------------------------------------------------------------------------------------------------------------|----|-------|-----|
|                             |                                         |                                                                                                                                                                                               |   | 2018 (i-vi); Riazi et al. 2019 (b, i-iii, g, i-iii)                                                                                                                                |    |       |     |
|                             | Interest                                | Veitch et al., 2017; Villanueva et al., 2012 (b) ; Ayllón et al. 2020                                                                                                                         | + | Veitch et al., 2017                                                                                                                                                                | +  | 3/4   | 75% |
|                             | Social norms                            | Veitch et al., 2017; Villanueva et al., 2014(i,ii)(g)                                                                                                                                         | + | Veitch et al., 2017; Villanueva et al., 2012 ; Love et al. 2020 (T2 ; i, ii)                                                                                                       | 00 | 3/9   | 33% |
|                             |                                         | Curtis et al., 2015; Love et al. 2020 (T1)                                                                                                                                                    | - |                                                                                                                                                                                    |    |       |     |
| <i>Parents' perceptions</i> | Parents' positive perceptions of safety | Carver et al. 2014 (T1); Huertas-Delgado et al. 2018; Janssen et al. 2016; Johansson, 2006; Love et al. 2020 (T1) Mitra et al. 2014; Santos et al. 2013; Villanueva et al. 2012 (b), 2014 (b) | + | Ghekiere et al. 2017; Lin et al. 2017; Love et al. 2020 (T2) (i,ii); Mammen et al. 2012; Prezsa et al. 2001; Villanueva et al. 2012                                                | ?? | 9/17  | 53% |
|                             |                                         | Huertas-Delgado et al., 2018                                                                                                                                                                  | - |                                                                                                                                                                                    |    |       |     |
|                             | Parents' negative perceptions of safety | Alparone et al. 2012 (Mother);Ayllón et al. 2019 (i,ii) ; Carver et al. 2014 (T1); Christian et al. 2015 (i,ii); Veitch et al. 2017                                                           | - | Carver et al. 2014 (T2); Mitra et al. 2014 (i,ii); Riazi et al. (b, i,ii ; g, i,ii) ; Smith et al. 2019 ; Villanueva et al. 2014                                                   | ?? | 7/16  | 44% |
|                             | Concern (stranger danger)               | Foster et al. 2014 (g); Huertas-Delgado et al. 2018 (i,ii); Love et al. 2020 (T1) ; Mitra et al. 2014 ; Riazi et al. 2019 (g) ;                                                               | - | Foster et al. 2014 (b); Huertas-Delgado et al. 2018 (i,ii); Johansson, 2006; Love et al. 2020 (T2) ; Santos et al. 2013                                                            | ?? | 6/15  | 40% |
|                             |                                         | Fyhri et al. 2009; Huertas-Delgado et al. 2018 (i,ii)                                                                                                                                         | + |                                                                                                                                                                                    |    |       |     |
|                             | Concern (crime)                         | Janssen et al. 2016; Mammen et al. 2012 ; Vlaar et al. 2019; Riazi et al. 2019 (b)                                                                                                            | - | Christian et al. 2015 (i-iii); Ghekiere et al. 2017; Huertas-Delgado et al. 2018 (i,ii); Prezsa et al. 2001; Riazi et al. 2019 (b) ; Vlaar et al. 2019 (i, ii) ; Wolfe et al. 2016 | 00 | 4/14  | 29% |
|                             | Concern (traffic)                       | Buliung et al. 2017(i,ii); Carver et al. 2014 (T1); Ghekiere et al. 2017 (g); Huertas-Delgado et al. 2018 (i,ii); Johansson, 2006 (i,ii);                                                     | - | Carver et al., 2014 (T2); Christian et al., 2015; Huertas-Delgado et al., 2018 (i-iv); Janssen et al.,                                                                             | -- | 16/21 | 76% |

|                                       |                             |                                                                                                                                               |   |                                                                                                                                                                                                     |    |      |     |
|---------------------------------------|-----------------------------|-----------------------------------------------------------------------------------------------------------------------------------------------|---|-----------------------------------------------------------------------------------------------------------------------------------------------------------------------------------------------------|----|------|-----|
|                                       |                             | Mammen et al., 2012; Riazi et al. 2019 (b ; g); Scheiner et al. 2019 (i,ii,iii) ; Villanueva et al. 2012; Wolfe et al. 2016                   |   | 2016 (i,ii); Love et al. 2020 (T1 ;T2) ; Mitra et al., 2014 (i,ii); Prezza et al. 2001 (Mothers); Riazi et al. 2019 (b; g); Smith et al. 2019; Veitch et al., 2017 (i,ii); Vlaar et al. 2019 (i,ii) |    |      |     |
|                                       | Social cohesion             | Alparone et al. 2012 (Mothers); Love et al. 2020 (T2) ; Prezza et al. 2001; Villanueva et al. 2012 (b); Vlaar et al. 2019 ; Wolfe et al. 2016 | + | Lin et al. 2017; Love et al. 2020 (T1; T2, i-iii)                                                                                                                                                   | ?? | 6/12 | 50% |
|                                       |                             | Love et al. 2020 (T1)                                                                                                                         | - |                                                                                                                                                                                                     |    |      |     |
|                                       | Informal social control     |                                                                                                                                               |   | Carver et al., 2014; Foster et al. 2014; Johansson, 2006; Lin et al. 2017; Prezza et al. 2001; Riazi et al. 2019 (b, g) ; Wolfe et al. 2016                                                         | 00 | 0/8  | 0%  |
|                                       | Social norms                | Christian et al. 2015 (i,ii)                                                                                                                  | - | Ghekiere et al. 2017; Mitra et al. 2014                                                                                                                                                             | ?  | 2/4  | 50% |
| <b>Built and physical environment</b> |                             |                                                                                                                                               |   |                                                                                                                                                                                                     |    |      |     |
| <i>Density</i>                        | Destination density         | Broberg et al. 2013a                                                                                                                          | + | Vlaar et al. 2019 (i,ii); Wolfe et al. 2016 (i-iii)                                                                                                                                                 | 0  | 1/6  | 17% |
|                                       | Road density                | Carver et al. 2014 (T2; g); Scheiner et al. 2019 (i,ii)                                                                                       | - | Buliung et al. 2017; Carver et al. 2014 (i-iv); Larsen et al. 2015; Scheiner et al. 2019 (i,ii) ; Smith et al. 2019 (i,ii) ; Wolfe et al. 2016 (i-iii)                                              | 00 | 3/16 | 19% |
|                                       | Population density          | Broberg et al., 2013a                                                                                                                         | + | He et al. 2017 (i-iii)                                                                                                                                                                              | 0  | 1/5  | 20% |
|                                       |                             | Larsen et al., 2015                                                                                                                           | - |                                                                                                                                                                                                     |    |      |     |
|                                       | Housing/residential density | Broberg et al. 2013a; Broberg et al., 2013b; Scheiner et al. 2019 ; Vlaar et al. 2019 ; Wolfe et al. 2016                                     | + | Scheiner et al. 2019                                                                                                                                                                                | ++ | 5/8  | 63% |
|                                       |                             | Broberg et al. 2013a; Broberg et al., 2013b                                                                                                   | - |                                                                                                                                                                                                     |    |      |     |

|                     |                                                                                                                                |                                                                                                                                                                                            |   |                                                                                                                                                                                     |    |       |     |
|---------------------|--------------------------------------------------------------------------------------------------------------------------------|--------------------------------------------------------------------------------------------------------------------------------------------------------------------------------------------|---|-------------------------------------------------------------------------------------------------------------------------------------------------------------------------------------|----|-------|-----|
| <i>Destinations</i> | Walking and cycling infrastructure                                                                                             | Veitch et al. 2017                                                                                                                                                                         | + | Ghekiere et al. 2017; Johansson, 2006; Mammen et al. 2012; Veitch et al. 2017 (i-iii)                                                                                               | 00 | 1/8   | 13% |
|                     |                                                                                                                                | Smith et al. 2019                                                                                                                                                                          | - |                                                                                                                                                                                     |    |       |     |
|                     | Green space                                                                                                                    | Alparone et al. 2012                                                                                                                                                                       | + | Broberg et al. 2013a; Broberg et al. 2013b; Veitch et al. 2017 (i, ii); Villanueva et al. 2012 (i,ii)                                                                               | 00 | 1/7   | 14% |
|                     | Other local destinations (shopping centre, community centre, supermarket, rec centre, retail shop, school, smaller food store) | Villanueva et al. 2012 (i-iv, b)                                                                                                                                                           | + | Christian et al. 2015; Ghekiere et al. 2017; Villanueva et al. 2012 (i-iv); Vlaar et al. 2019 (i,ii) ; Wolfe et al. 2016                                                            | 00 | 4/13  | 31% |
| <i>Design</i>       | Type of housing                                                                                                                | Broberg et al. 2013b; He et al. 2017 (i,ii); Prezza et al. 2001(i,ii)                                                                                                                      | + | Buliung et al. 2017; Lin et al. 2017 (i-iii)                                                                                                                                        | ?? | 5/10  | 50% |
|                     |                                                                                                                                | He et al., 2017                                                                                                                                                                            | - |                                                                                                                                                                                     |    |       |     |
|                     | Length of residency in one's home                                                                                              | Larsen et al. 2015; Mitra et al., 2014; Prezza et al. 2001                                                                                                                                 | + | Buliung et al. 2017; Lin et al. 2017                                                                                                                                                | ++ | 3/5   | 60% |
|                     | Access to outdoor space/walking/cycling                                                                                        | Carver et al. 2012 (i,ii)                                                                                                                                                                  | + | Carver et al. 2014                                                                                                                                                                  | +  | 2/3   | 67% |
|                     | Walkability                                                                                                                    | Riazi et al. 2019 (g; 400m); Villanueva et al., 2012, 2014                                                                                                                                 | + | Riazi et al. 2019 (b, 400m, 1600m)                                                                                                                                                  | ?? | 3/7   | 43% |
|                     |                                                                                                                                | Carver et al., 2014 (b); Riazi et al 2019 (g; 1600m)                                                                                                                                       | - |                                                                                                                                                                                     |    |       |     |
|                     | Aesthetic quality of neighbourhood                                                                                             |                                                                                                                                                                                            |   | Buliung et al. 2017; Ghekiere et al. 2017; Vlaar et al. 2019 (i, ii)                                                                                                                | 0  | 0/4   | 0%  |
|                     | Urbanization                                                                                                                   | Kyttä et al. 2015 (suburban); Loo et al. 2015 (suburban); Lopes et al. 2014 (i,ii, highly urbanized) Lopes et al. 2014 (i-v, non-urbanized); Lopes et al. 2014 (i-v, moderately urbanized) | + | Cervesato et al. 2019 (i-iv) ; Cordovil et al. 2015; Delisle Nyström et al. 2019 ; Fyhri et al. 2009; Ghekiere et al. 2017; Kyttä, 2004; Love et al. 2020 (T2); Mammen et al. 2012; | ?? | 14/35 | 40% |

|                  |                                                                             |                                                                                                                                                                                                                                                                                                                                                                              |   |                                                                                                                           |    |       |      |
|------------------|-----------------------------------------------------------------------------|------------------------------------------------------------------------------------------------------------------------------------------------------------------------------------------------------------------------------------------------------------------------------------------------------------------------------------------------------------------------------|---|---------------------------------------------------------------------------------------------------------------------------|----|-------|------|
|                  |                                                                             |                                                                                                                                                                                                                                                                                                                                                                              |   | Riazi et al. 2019 (b ; g, i, ii)<br>Schoeppe et al. 2016b                                                                 |    |       |      |
|                  |                                                                             | Alparone et al., 2012; Cervesato et al. 2019 (i-iv); Lopes et al., 2014 ;<br>Riazi et al. 2019 (b)                                                                                                                                                                                                                                                                           | - |                                                                                                                           |    |       |      |
| <i>Diversity</i> | Land use mix                                                                | Carver et al., 2014 (T2, g) ; Sharmin et al. 2019                                                                                                                                                                                                                                                                                                                            | + | Buliung et al. 2017;<br>Ghekiere et al. 2017 ;<br>Scheiner et al. 2019 ;<br>Sharmin et al. 2019 ; Vlaar et al 2019 (i,ii) | 00 | 2/10  | 20%  |
|                  |                                                                             | Scheiner et al. 2019 ; Sharmin et al. 2019                                                                                                                                                                                                                                                                                                                                   | - |                                                                                                                           |    |       |      |
|                  | Socioeconomic status / neighbourhood socioeconomic deprivation (low income) | Love et al. 2020 (T1) ; Mitra et al. 2014; Veitch et al. 2008 (i,ii)                                                                                                                                                                                                                                                                                                         | + | Carver et al. 2014; Delisle Nyström et al. 2019;<br>Scheiner et al. 2019                                                  | ?? | 4/7   | 57%  |
| <i>Distance</i>  | Distance (short)                                                            | Aggio et al. 2017; Buliung et al. 2017; Cervesato et al. 2019 (weekday, i-vi ; weekend, i-iv) i,ii) ;<br>Christian et al. 2015 (i,ii); Cordovil et al. 2015; Fyhri et al., 2009 (i,ii);<br>He et al. 2017; Lin et al. 2017; Loo et al. 2015; Love et al. 2020 (T1)(i,ii) ; Mammen et al. 2012; Prezza et al. 2001 ; Scheiner et al. 2019 (i,ii) ; Villanueva et al. 2012 (b) | + | Larsen et al. 2015; Love et al. 2020 (T2)                                                                                 | ++ | 27/30 | 90%  |
|                  |                                                                             | Broberg et al., 2013b                                                                                                                                                                                                                                                                                                                                                        | - |                                                                                                                           |    |       |      |
|                  | Distance/deviation to mother's work                                         | He et al., 2017 (i,ii)                                                                                                                                                                                                                                                                                                                                                       | + | He et al., 2017                                                                                                           | +  | 2/3   | 67%  |
|                  | Distance/deviation to father's work                                         | He et al., 2017                                                                                                                                                                                                                                                                                                                                                              | - | He et al., 2017 (i,ii)                                                                                                    | 0  | 1/3   | 33%  |
|                  | Proximity to green space                                                    | Christian et al., 2015 (i,ii); Prezza et al., 2001; Villanueva et al., 2012 (b)                                                                                                                                                                                                                                                                                              | + |                                                                                                                           | +  | 4/4   | 100% |

IM=independent mobility; PA=physical activity. Roman numerals indicated number of correlates examined in study. Girl = g; Boy = b; Meters = m; Time point 1: T1; Time point 2: T2; + = positive association (both variables increase); - = negative association (one variable increases while the other decreases); 0 = no association; Based on the percentage of studies supporting the association, the associations were labeled 0-33% → no association (0); 34-59% →

indeterminate or inconsistent (?); 60-100% → positive or negative association (+ or -). If more than 4 studies supported the association in the same direction, it was labeled 00, ??, ++, or --. The ?? code indicated that a variable has been frequently studied with considerable lack of consistency in findings. Broberg et al., 2013*a* = Broberg, Kytä, & Fagerholm: Child-friendly urban structures: Bullerby revisited; Broberg 2013*b* = Broberg, Salminen, & Kytä: Physical environmental characteristics promoting independent and active transport to children's meaningful places; Schoeppe 2015*a* = Schoeppe, Tranter, Duncan, Curtis, Carver, & Malone: Australian children's independent mobility levels: secondary analyses of cross-sectional data between 1991 and 2012; Schoeppe 2015*b* = Schoeppe, Duncan, Badland, Rebar, & Vandelandotte: Too far from home? Adult attitudes on children's independent mobility range.

**Table S5.** Sample age ranges of included studies (n=53)

| Age<br>(Years) | 5 | 6 | 7                        | 8 | 9 | 10 | 11                              | 12 | 13                              | 14 | 15 | 16 | 17 | 18 |
|----------------|---|---|--------------------------|---|---|----|---------------------------------|----|---------------------------------|----|----|----|----|----|
| Grade<br>Level | 1 | 2 | 3                        | 4 | 5 | 6  | 7                               | 8  | 9                               | 10 | 11 | 12 |    |    |
|                |   |   | Alparone & Pacilli, 2012 |   |   |    |                                 |    |                                 |    |    |    |    |    |
|                |   |   |                          |   |   |    | Broberg, Kytä, et al., 2013     |    |                                 |    |    |    |    |    |
|                |   |   |                          |   |   |    | Broberg, Salminen, et al., 2013 |    | Broberg, Salminen, et al., 2013 |    |    |    |    |    |
|                |   |   |                          |   |   |    | Carver et al., 2012             |    |                                 |    |    |    |    |    |
|                |   |   |                          |   |   |    | Carver et al., 2013             |    |                                 |    |    |    |    |    |
|                |   |   |                          |   |   |    | Carver et al., 2014             |    |                                 |    |    |    |    |    |
|                |   |   |                          |   |   |    | Chaudhury et al., 2017          |    |                                 |    |    |    |    |    |
|                |   |   |                          |   |   |    | Christian et al., 2014          |    |                                 |    |    |    |    |    |
|                |   |   |                          |   |   |    | Christian et al., 2015          |    |                                 |    |    |    |    |    |
|                |   |   |                          |   |   |    | Christian et al., 2016          |    |                                 |    |    |    |    |    |
|                |   |   |                          |   |   |    | Cordovil et al., 2015           |    |                                 |    |    |    |    |    |
|                |   |   |                          |   |   |    | Foster et al., 2014             |    |                                 |    |    |    |    |    |
|                |   |   |                          |   |   |    | Fyhri & Hjorthol, 2009          |    |                                 |    |    |    |    |    |
|                |   |   |                          |   |   |    | Ghekiere et al., 2017           |    |                                 |    |    |    |    |    |
|                |   |   |                          |   |   |    | He & Giuliano, 2017             |    |                                 |    |    |    |    |    |
|                |   |   |                          |   |   |    | Johansson, 2006                 |    |                                 |    |    |    |    |    |
|                |   |   |                          |   |   |    | Kytä, 2004                      |    |                                 |    |    |    |    |    |
|                |   |   |                          |   |   |    | Kytä et al., 2015 (also 8-10)   |    |                                 |    |    |    |    |    |
|                |   |   |                          |   |   |    | Lam & Loo, 2014                 |    |                                 |    |    |    |    |    |
|                |   |   |                          |   |   |    | Larsen et al., 2015             |    |                                 |    |    |    |    |    |
|                |   |   |                          |   |   |    | Lin et al., 2017                |    |                                 |    |    |    |    |    |
|                |   |   |                          |   |   |    | Loo & Lam, 2015                 |    |                                 |    |    |    |    |    |
|                |   |   |                          |   |   |    | Lopes et al., 2014              |    |                                 |    |    |    |    |    |
|                |   |   |                          |   |   |    | Mammen et al., 2012             |    |                                 |    |    |    |    |    |

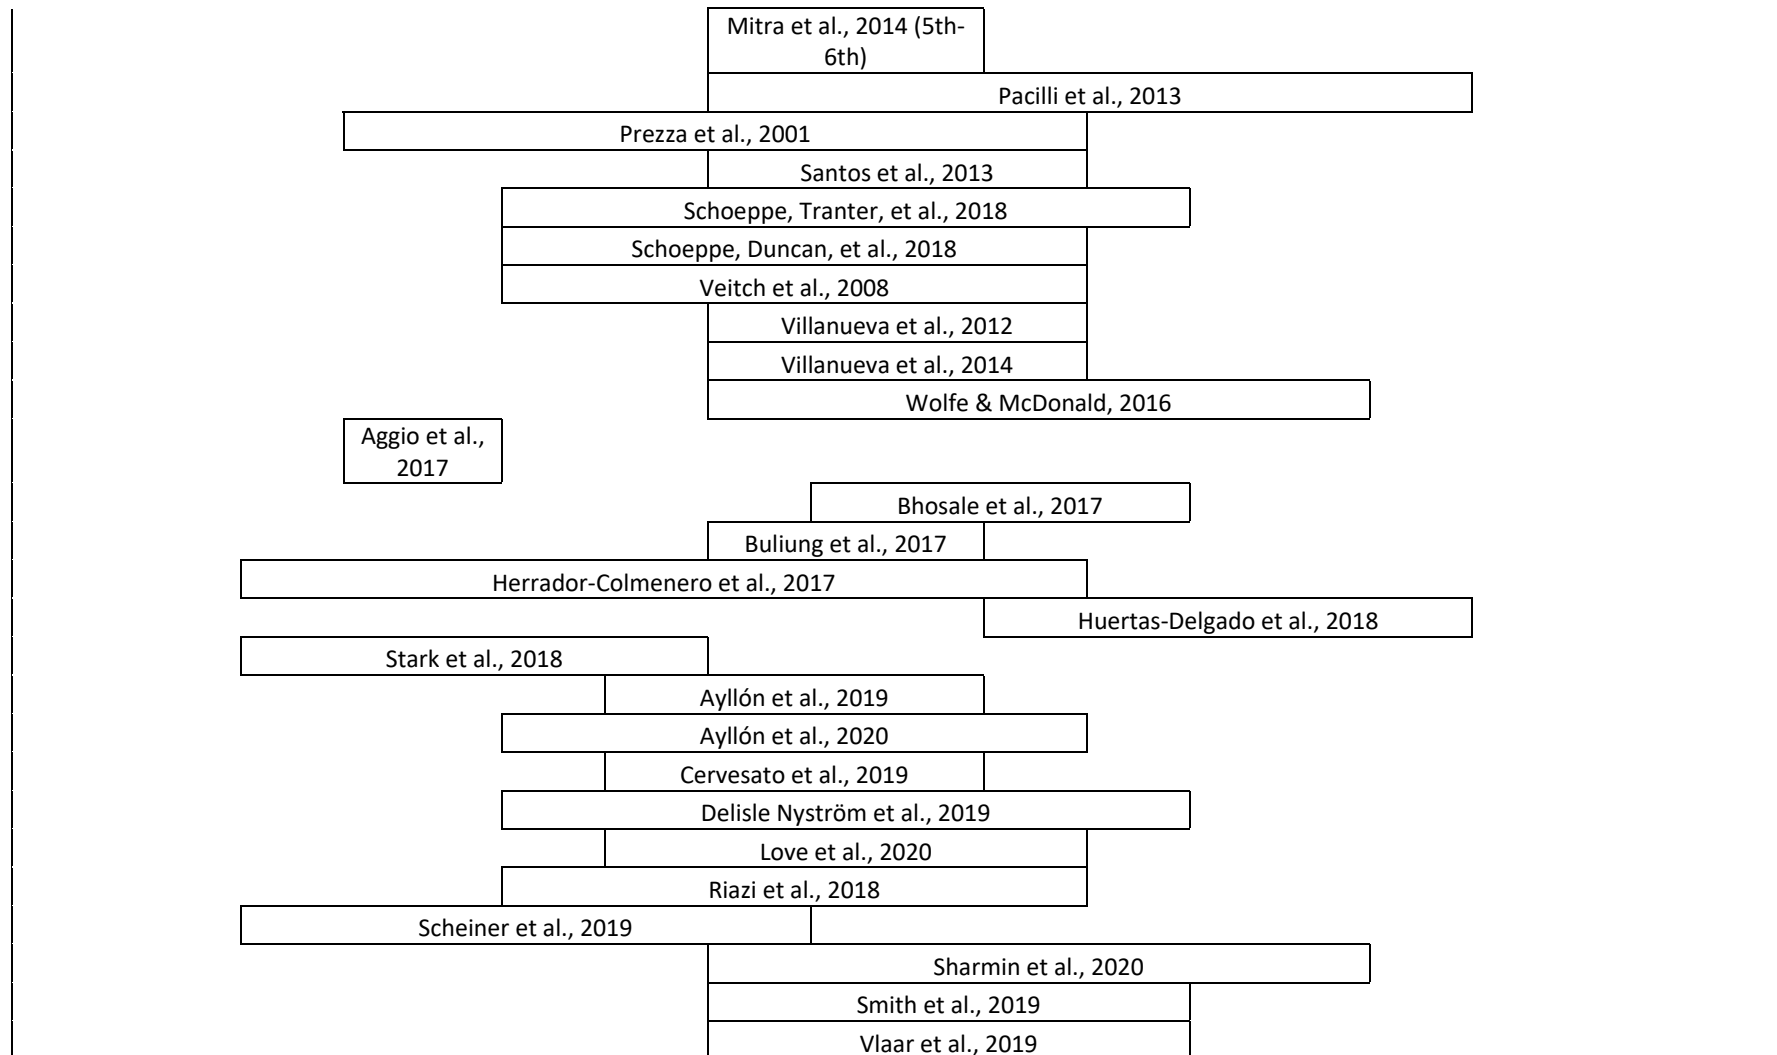

Supplement: s1 [file s1]
